# Supplementary material for: Habitat Imaging-Based 18F-FDG PET/CT Radiomics for the Preoperative Discrimination of Non-small Cell Lung Cancer and Benign Inflammatory Diseases
Source: Front Oncol. 2021 Oct 6;11:759897. doi: 10.3389/fonc.2021.759897 (PMC8526895; doi:10.3389/fonc.2021.759897)
Supplement: Supplementary file 1 [file DataSheet_1.docx]

Supplementary Material

# Supplementary Figures and Tables

## Supplementary Figures


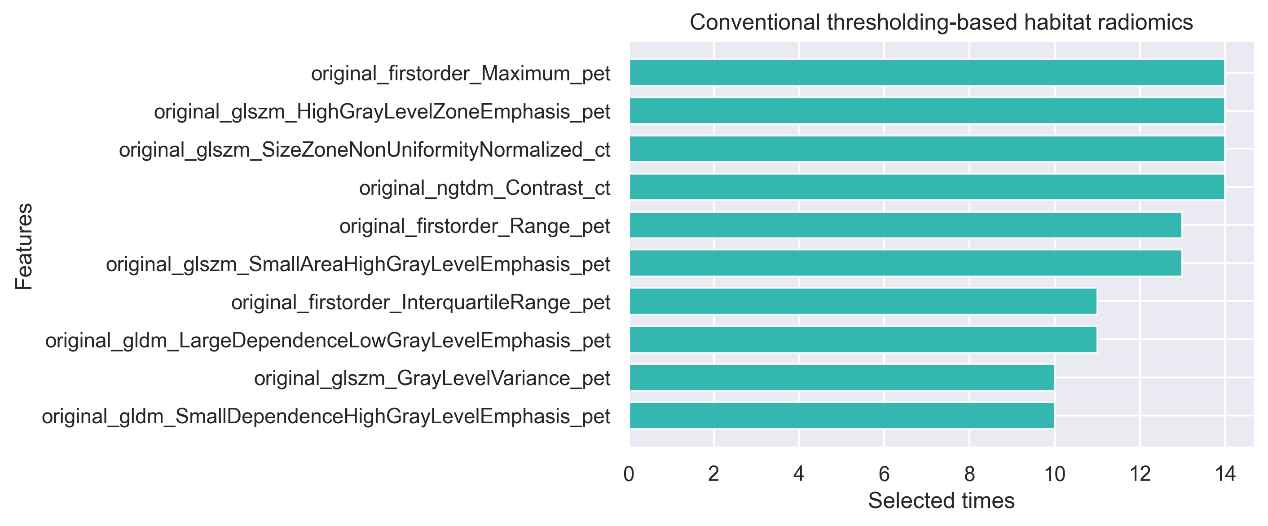


(a)


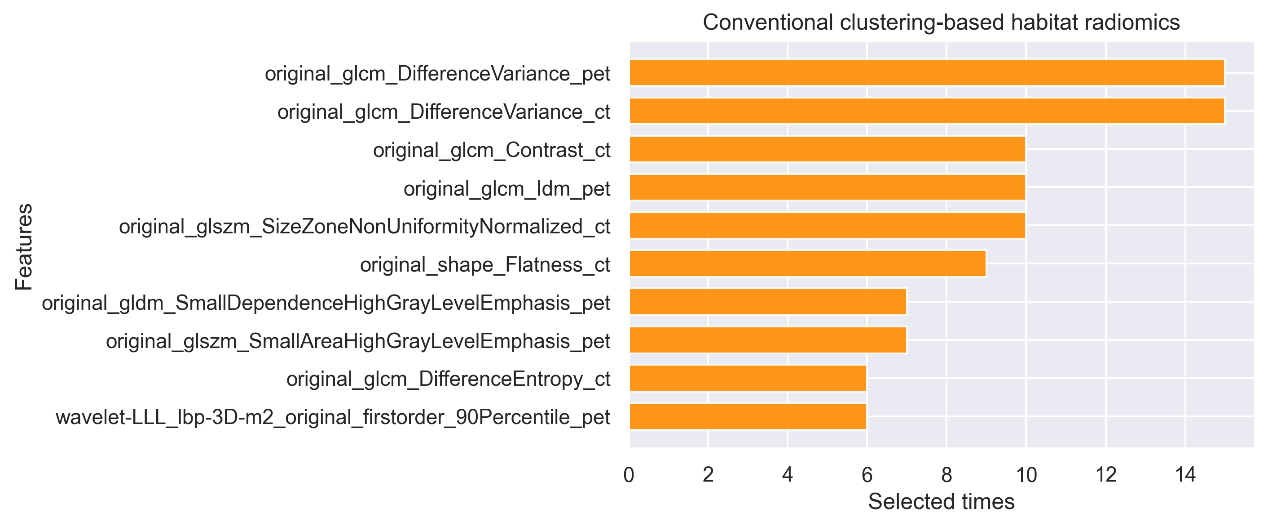
(b)


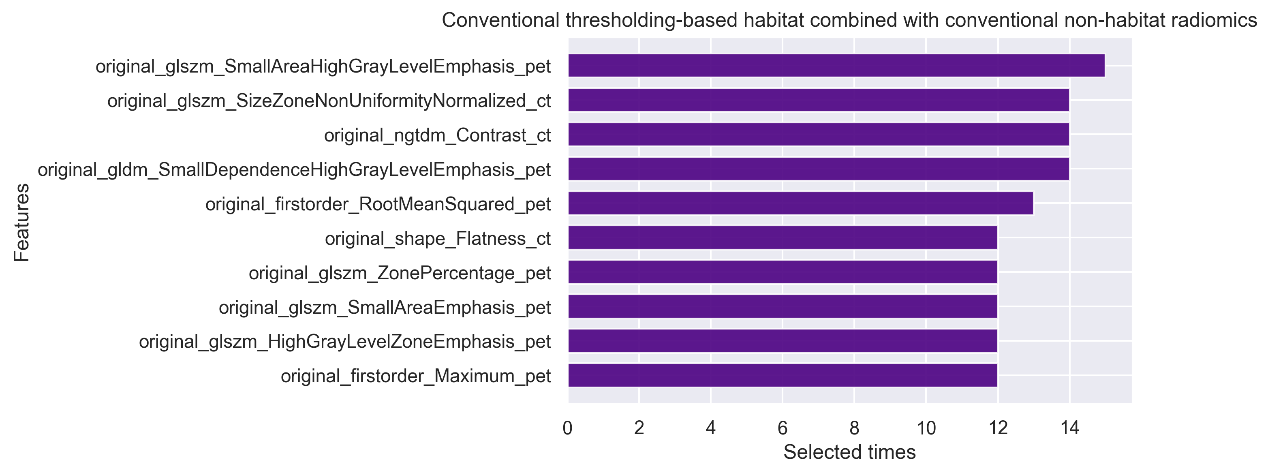
(c)


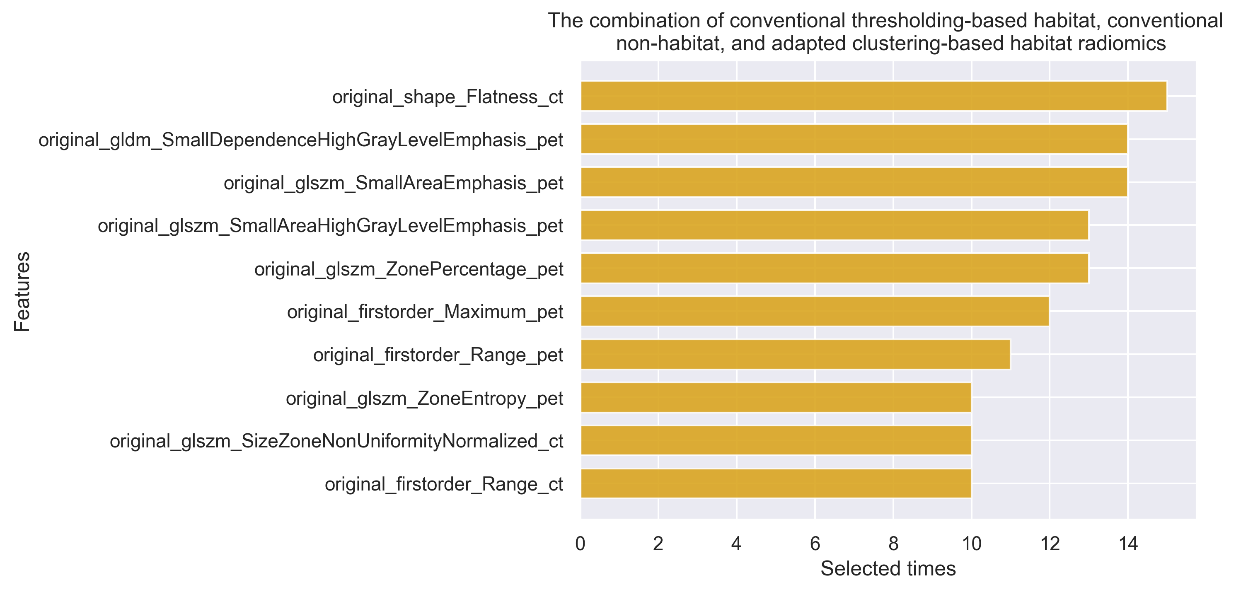
(d)

**Supplementary Figure 1** The top 10 selected features of (a) conventional thresholding-based, (b) conventional clustering-based, (c) conventional thresholding-based combined with nonhabitat, and (d) the combination of conventional thresholding-based, adapted clustering-based, and nohabiat methods


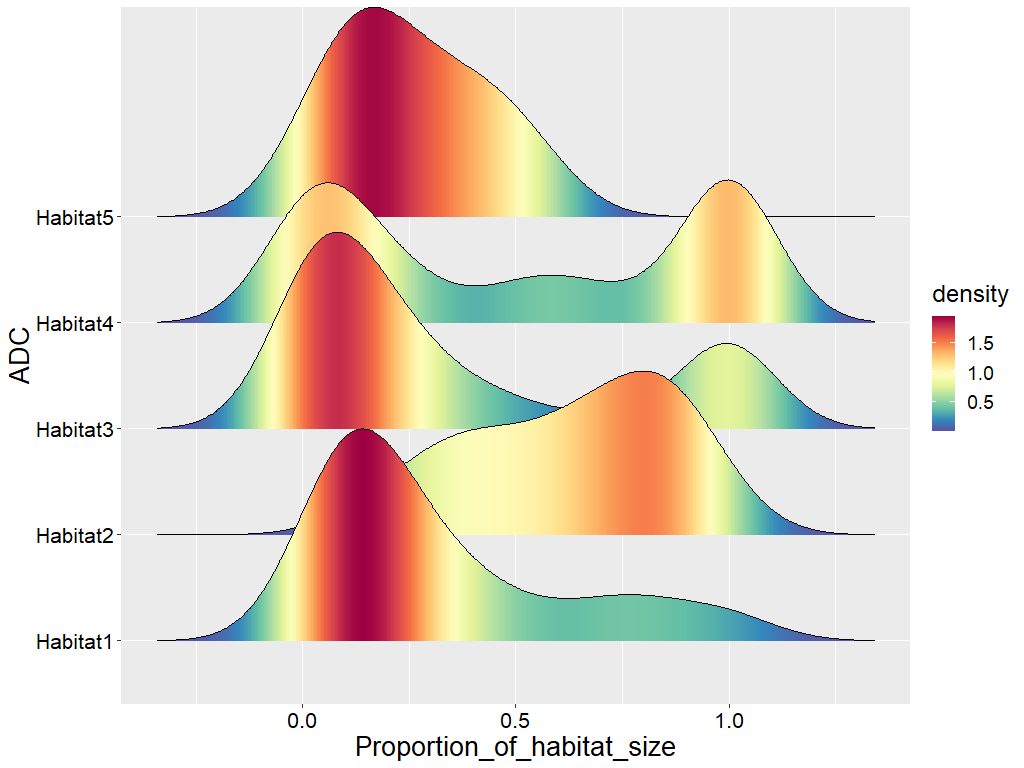

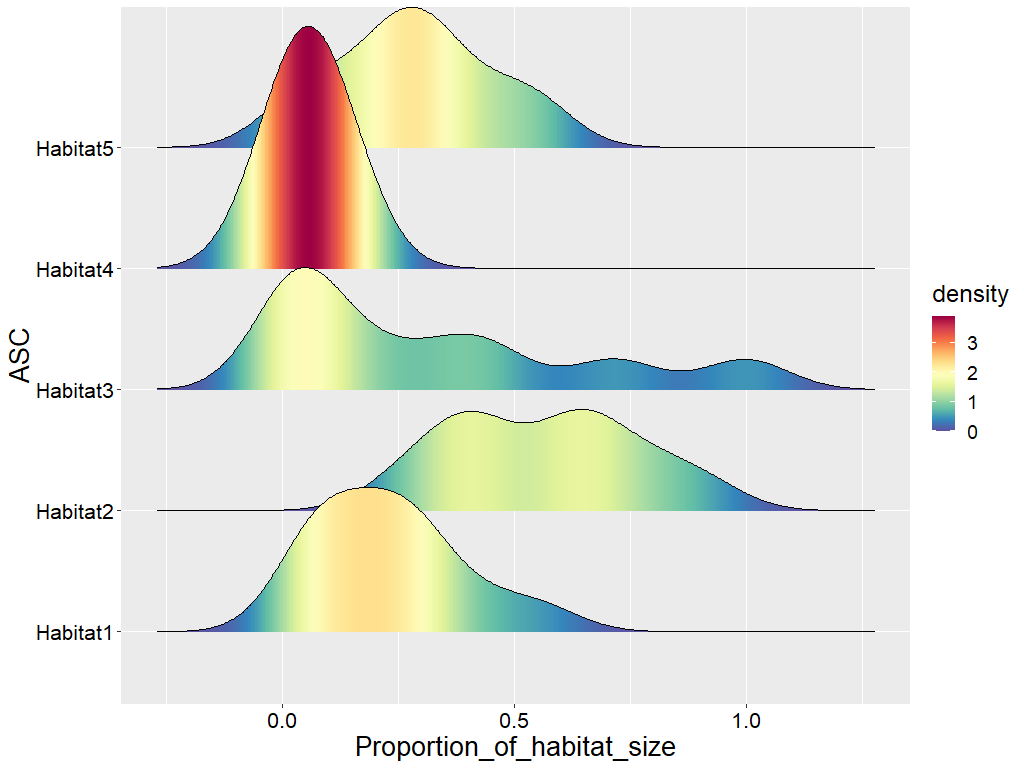


1. (b)


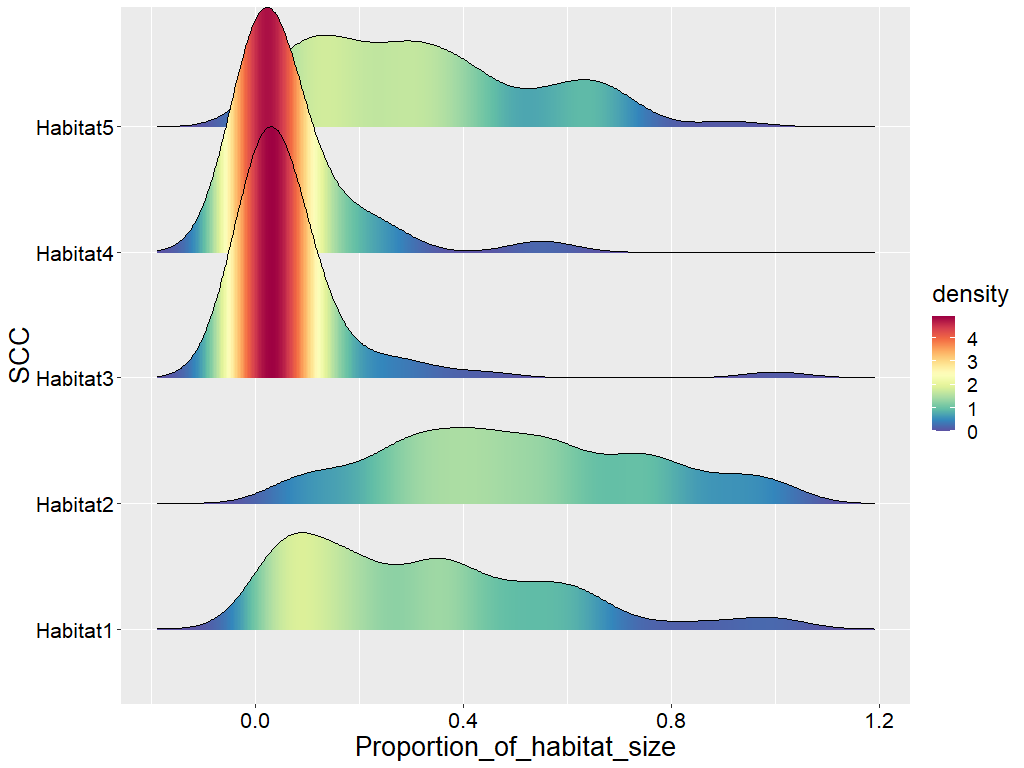

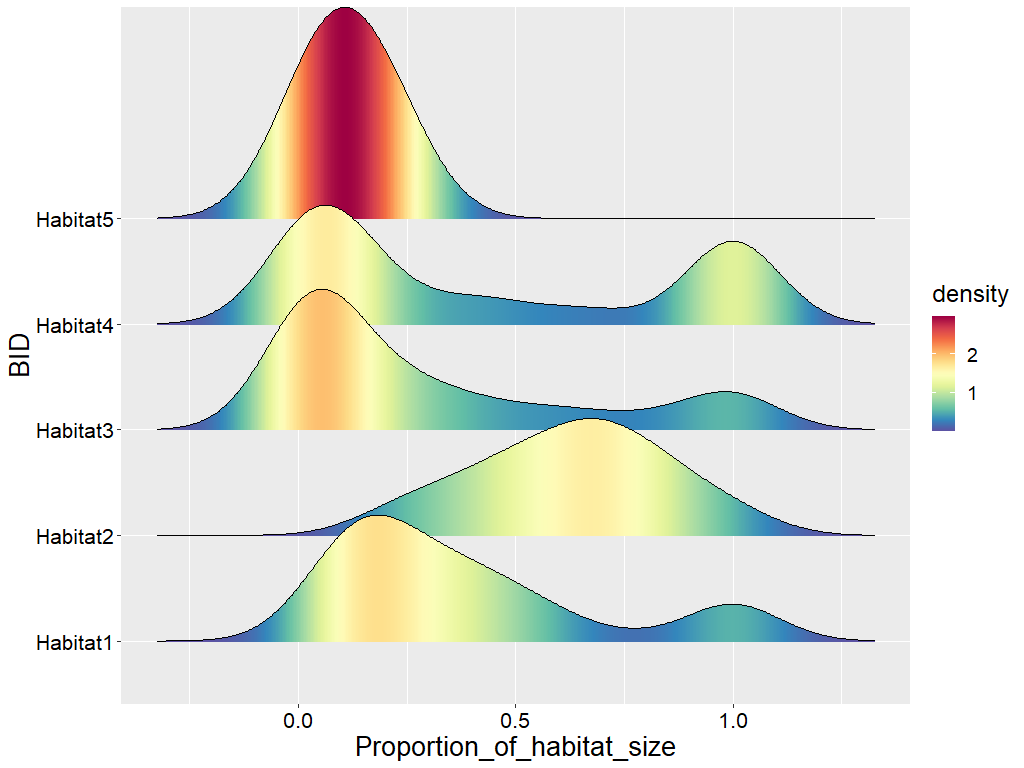


(c) (d)

**Supplementary Figure 2** The density of habitat size proportion for (a) ADC, (b) ASC, (c) SCC, and (d) BID

## Supplementary Tables

**Supplementary Table 1** The detail performances for specific combinations of feature selection method and classifier

| Habitat Method | Feature selection | Classifier | Five-fold train AUC | Five-fold train Acc. | Five-fold train prec. | Five-fold train sens. | Five-fold train spec. | Five-fold test AUC | Five-fold test acc. | Five-fold test prec. | Five-fold test sens. | Five-fold test spec. |
| --- | --- | --- | --- | --- | --- | --- | --- | --- | --- | --- | --- | --- |
| Conventional thresholding-based +  Non-habitat | SVM-RFE | Random forest | 0.9496 | 0.9438 | 0.962 | 0.9598 | 0.906 | 0.7343 | 0.7266 | 0.7928 | 0.838 | 0.4516 |
| Gradient bossting decision trees | 0.9553 | 0.97 | 0.9672 | 0.9914 | 0.9164 | 0.7231 | 0.7328 | 0.7906 | 0.8552 | 0.4306 |
| SVM | 0.8449 | 0.847 | 0.8456 | 0.9642 | 0.559 | 0.7142 | 0.7454 | 0.7844 | 0.8904 | 0.3854 |
| Logistic regression | 0.8053 | 0.8106 | 0.8196 | 0.9412 | 0.4896 | 0.7376 | 0.7358 | 0.7792 | 0.8812 | 0.3748 |
| Adaboost | 0.8103 | 0.8268 | 0.8196 | 0.9718 | 0.4704 | 0.7072 | 0.7294 | 0.7622 | 0.903 | 0.3012 |
| Bagging | 0.8244 | 0.8278 | 0.8386 | 0.9414 | 0.549 | 0.7316 | 0.7204 | 0.7672 | 0.8724 | 0.3432 |
| LASSO | Random forest | 0.9502 | 0.944 | 0.9574 | 0.9652 | 0.8924 | 0.7402 | 0.7296 | 0.8008 | 0.8242 | 0.4948 |
| Gradient bossting decision trees | 0.9444 | 0.9588 | 0.957 | 0.9872 | 0.8898 | 0.7336 | 0.7174 | 0.7932 | 0.8194 | 0.4602 |
| SVM | 0.8167 | 0.8268 | 0.8262 | 0.9608 | 0.4978 | 0.7119 | 0.7328 | 0.7718 | 0.8896 | 0.3428 |
| Logistic regression | 0.7755 | 0.7766 | 0.7848 | 0.9454 | 0.3598 | 0.7452 | 0.7486 | 0.7764 | 0.9176 | 0.3352 |
| Adaboost | 0.7871 | 0.7958 | 0.7946 | 0.962 | 0.387 | 0.7243 | 0.7388 | 0.7658 | 0.9168 | 0.3024 |
| Bagging | 0.8278 | 0.8238 | 0.8288 | 0.9508 | 0.5108 | 0.7405 | 0.7266 | 0.766 | 0.8948 | 0.3106 |
| Random forest | Random forest | 0.9362 | 0.9324 | 0.9374 | 0.9708 | 0.8388 | 0.7100 | 0.7326 | 0.7978 | 0.8378 | 0.472 |
| Gradient bossting decision trees | 0.8886 | 0.9154 | 0.913 | 0.9806 | 0.7564 | 0.6902 | 0.7112 | 0.7912 | 0.8108 | 0.4586 |
| SVM | 0.7624 | 0.8006 | 0.795 | 0.975 | 0.3712 | 0.6421 | 0.7296 | 0.764 | 0.9118 | 0.2782 |
| Logistic regression | 0.7247 | 0.7766 | 0.7746 | 0.9674 | 0.3064 | 0.6759 | 0.7296 | 0.7518 | 0.9252 | 0.248 |
| Adaboost | 0.7499 | 0.7928 | 0.7902 | 0.9662 | 0.3656 | 0.6625 | 0.6956 | 0.7282 | 0.9122 | 0.1604 |
| Bagging | 0.8077 | 0.8244 | 0.8216 | 0.9642 | 0.481 | 0.6984 | 0.7232 | 0.761 | 0.8904 | 0.3122 |
| Adapted clustering-based | SVM-RFE | Random forest | 0.9761 | 0.9592 | 0.9596 | 0.9844 | 0.8976 | 0.7279 | 0.7294 | 0.7806 | 0.8616 | 0.4064 |
| Gradient bossting decision trees | 0.9707 | 0.9568 | 0.9688 | 0.97 | 0.9244 | 0.6963 | 0.698 | 0.7788 | 0.8048 | 0.4416 |
| SVM | 0.8524 | 0.8444 | 0.8432 | 0.96 | 0.565 | 0.7268 | 0.7674 | 0.8 | 0.8976 | 0.4492 |
| Logistic regression | 0.8137 | 0.8184 | 0.8284 | 0.9412 | 0.522 | 0.7256 | 0.7042 | 0.7512 | 0.8704 | 0.3 |
| Adaboost | 0.8230 | 0.8126 | 0.8232 | 0.948 | 0.4876 | 0.7014 | 0.7198 | 0.7648 | 0.8742 | 0.341 |
| Bagging | 0.8078 | 0.805 | 0.8202 | 0.9324 | 0.4976 | 0.7201 | 0.7234 | 0.7536 | 0.9064 | 0.2778 |
| LASSO | Random forest | 0.9789 | 0.9632 | 0.9662 | 0.9822 | 0.9164 | 0.7498 | 0.7514 | 0.8076 | 0.8528 | 0.5046 |
| Gradient bossting decision trees | 0.93 | 0.919 | 0.9172 | 0.9754 | 0.7826 | 0.7264 | 0.7324 | 0.7938 | 0.8388 | 0.4712 |
| SVM | 0.8439 | 0.8334 | 0.858 | 0.9178 | 0.6292 | 0.7198 | 0.7258 | 0.7862 | 0.8378 | 0.4496 |
| Logistic regression | 0.7851 | 0.779 | 0.7838 | 0.951 | 0.3628 | 0.7451 | 0.7234 | 0.7494 | 0.9152 | 0.2578 |
| Adaboost | 0.7904 | 0.7798 | 0.787 | 0.9458 | 0.3792 | 0.7314 | 0.6884 | 0.7284 | 0.8882 | 0.2042 |
| Bagging | 0.835 | 0.8106 | 0.8094 | 0.9598 | 0.4486 | 0.7429 | 0.7294 | 0.7614 | 0.9022 | 0.313 |
| Random forest | Random forest | 0.9762 | 0.952 | 0.9518 | 0.9832 | 0.876 | 0.7418 | 0.745 | 0.7884 | 0.875 | 0.4298 |
| Gradient bossting decision trees | 0.8457 | 0.8254 | 0.8338 | 0.9464 | 0.532 | 0.7339 | 0.7514 | 0.7754 | 0.9158 | 0.3556 |
| SVM | 0.8184 | 0.7978 | 0.7986 | 0.9568 | 0.4136 | 0.7126 | 0.742 | 0.7622 | 0.9248 | 0.3018 |
| Logistic regression | 0.773 | 0.7682 | 0.7682 | 0.9632 | 0.2954 | 0.740250605 | 0.7484 | 0.758 | 0.9472 | 0.2686 |
| Adaboost | 0.7815 | 0.7642 | 0.7726 | 0.949 | 0.3172 | 0.7125 | 0.7072 | 0.741 | 0.9016 | 0.2358 |
| Bagging | 0.794 | 0.7932 | 0.8012 | 0.9454 | 0.4244 | 0.7305 | 0.695 | 0.739 | 0.8796 | 0.248 |
| Conventional thresholding-based | SVM-RFE | Random forest | 0.9568 | 0.9368 | 0.9348 | 0.9814 | 0.8278 | 0.7262 | 0.7318 | 0.7736 | 0.8816 | 0.3658 |
| Gradient bossting decision trees | 0.9632 | 0.968 | 0.9652 | 0.9914 | 0.9112 | 0.709 | 0.704 | 0.7688 | 0.833 | 0.3864 |
| SVM | 0.8484 | 0.8444 | 0.8438 | 0.9594 | 0.562 | 0.719 | 0.7134 | 0.7528 | 0.8898 | 0.279 |
| Logistic regression | 0.7954 | 0.8054 | 0.8096 | 0.9496 | 0.4516 | 0.727 | 0.7322 | 0.7654 | 0.9028 | 0.314 |
| Adaboost | 0.8071 | 0.8318 | 0.8314 | 0.9584 | 0.5218 | 0.6803 | 0.7164 | 0.7598 | 0.8808 | 0.311 |
| Bagging | 0.8129 | 0.8168 | 0.8388 | 0.9212 | 0.5622 | 0.7266 | 0.735 | 0.7816 | 0.8716 | 0.397 |
| LASSO | Random forest | 0.9447 | 0.9354 | 0.9444 | 0.9672 | 0.858 | 0.7308 | 0.7382 | 0.7926 | 0.8548 | 0.4508 |
| Gradient bossting decision trees | 0.9438 | 0.9494 | 0.9708 | 0.9584 | 0.9272 | 0.7032 | 0.6756 | 0.768 | 0.7806 | 0.4218 |
| SVM | 0.7946 | 0.8192 | 0.8216 | 0.955 | 0.4872 | 0.7047 | 0.7352 | 0.7678 | 0.9028 | 0.321 |
| Logistic regression | 0.7536 | 0.7718 | 0.7724 | 0.9628 | 0.3036 | 0.7258 | 0.7474 | 0.7578 | 0.9468 | 0.259 |
| Adaboost | 0.7627 | 0.7852 | 0.7924 | 0.9488 | 0.3852 | 0.715627278 | 0.7382 | 0.7612 | 0.92 | 0.289 |
| Bagging | 0.8194 | 0.82 | 0.8178 | 0.9628 | 0.4704 | 0.7221 | 0.7476 | 0.7688 | 0.9248 | 0.3122 |
| Random forest | Random forest | 0.9508 | 0.9422 | 0.95 | 0.9704 | 0.8738 | 0.7022 | 0.701 | 0.7734 | 0.82 | 0.4086 |
| Gradient bossting decision trees | 0.8514 | 0.8528 | 0.8598 | 0.9618 | 0.5872 | 0.6875 | 0.7166 | 0.7708 | 0.8634 | 0.353 |
| SVM | 0.7594 | 0.7796 | 0.771 | 0.9824 | 0.2822 | 0.6786 | 0.7258 | 0.7424 | 0.9434 | 0.1956 |
| Logistic regression | 0.7242 | 0.7796 | 0.7724 | 0.9782 | 0.293 | 0.7021 | 0.7568 | 0.7608 | 0.9606 | 0.2592 |
| Adaboost | 0.7417 | 0.7688 | 0.7672 | 0.9704 | 0.2746 | 0.6922 | 0.7258 | 0.7504 | 0.9248 | 0.2356 |
| Bagging | 0.7996 | 0.821 | 0.8268 | 0.9464 | 0.5132 | 0.7083 | 0.7258 | 0.7598 | 0.8992 | 0.3024 |
| Adapted clustering-based + Non-habitat | SVM-RFE | Random forest | 0.9856 | 0.9804 | 0.9796 | 0.9934 | 0.9488 | 0.7451 | 0.7564 | 0.8054 | 0.8678 | 0.4826 |
| Gradient bossting decision trees | 0.9652 | 0.9624 | 0.9608 | 0.9882 | 0.9004 | 0.7337 | 0.747 | 0.7942 | 0.8676 | 0.4504 |
| SVM | 0.8727 | 0.8586 | 0.8638 | 0.9516 | 0.6318 | 0.7251 | 0.7532 | 0.7908 | 0.8896 | 0.4186 |
| Logistic regression | 0.8451 | 0.8366 | 0.8432 | 0.9474 | 0.5676 | 0.7396 | 0.7624 | 0.7898 | 0.9074 | 0.4092 |
| Adaboost | 0.8698 | 0.8618 | 0.8726 | 0.9472 | 0.6538 | 0.6917 | 0.7156 | 0.7686 | 0.8584 | 0.3636 |
| Bagging | 0.8308 | 0.8298 | 0.8432 | 0.9352 | 0.5728 | 0.7256 | 0.75 | 0.7756 | 0.916 | 0.3432 |
| LASSO | Random forest | 0.981 | 0.975 | 0.973 | 0.9924 | 0.9328 | 0.7478 | 0.722 | 0.7886 | 0.8326 | 0.4492 |
| Gradient bossting decision trees | 0.962 | 0.9576 | 0.9644 | 0.977 | 0.9112 | 0.7420 | 0.747 | 0.8026 | 0.8546 | 0.4836 |
| SVM | 0.8479 | 0.8352 | 0.8336 | 0.9602 | 0.5298 | 0.7491 | 0.7596 | 0.772 | 0.9386 | 0.3228 |
| Logistic regression | 0.7989 | 0.786 | 0.7864 | 0.9626 | 0.355 | 0.7471 | 0.7344 | 0.7482 | 0.9428 | 0.2258 |
| Adaboost | 0.8033 | 0.7928 | 0.8112 | 0.9274 | 0.4656 | 0.7334 | 0.7282 | 0.762 | 0.8984 | 0.3102 |
| Bagging | 0.8632 | 0.85 | 0.8486 | 0.9604 | 0.5806 | 0.7537 | 0.7468 | 0.7746 | 0.9074 | 0.354 |
| Random forest | Random forest | 0.9476 | 0.932 | 0.9228 | 0.988 | 0.7952 | 0.7325 | 0.7376 | 0.7768 | 0.8856 | 0.376 |
| Gradient bossting decision trees | 0.8382 | 0.8376 | 0.8318 | 0.9746 | 0.503 | 0.7251 | 0.7376 | 0.7672 | 0.903 | 0.332 |
| SVM | 0.7927 | 0.8048 | 0.8056 | 0.9582 | 0.43 | 0.6985 | 0.747 | 0.7768 | 0.9074 | 0.3546 |
| Logistic regression | 0.7728 | 0.7802 | 0.7826 | 0.9572 | 0.3498 | 0.7478 | 0.7562 | 0.7674 | 0.9474 | 0.2908 |
| Adaboost | 0.7828 | 0.7858 | 0.7914 | 0.9504 | 0.3846 | 0.7176 | 0.7376 | 0.7644 | 0.9162 | 0.3006 |
| Bagging | 0.8154 | 0.8116 | 0.8108 | 0.9592 | 0.4512 | 0.7351 | 0.722 | 0.7514 | 0.912 | 0.2596 |
| Adapted clustering-based + Non-habitat + Conventional thresholding-based | SVM-RFE | Random forest | 0.9373 | 0.935 | 0.9346 | 0.9772 | 0.8304 | 0.7249 | 0.7514 | 0.8094 | 0.851 | 0.5052 |
| Gradient bossting decision trees | 0.9277 | 0.9458 | 0.9522 | 0.9728 | 0.8792 | 0.7253 | 0.7328 | 0.8066 | 0.82 | 0.5158 |
| SVM | 0.8458 | 0.8452 | 0.8454 | 0.9608 | 0.5622 | 0.7204 | 0.7514 | 0.7802 | 0.9076 | 0.3642 |
| Logistic regression | 0.8099 | 0.83 | 0.8344 | 0.9498 | 0.5354 | 0.7237 | 0.7296 | 0.7678 | 0.8902 | 0.3334 |
| Adaboost | 0.7946 | 0.8228 | 0.8162 | 0.9718 | 0.4576 | 0.684 | 0.7202 | 0.7468 | 0.9158 | 0.235 |
| Bagging | 0.8326 | 0.8352 | 0.8428 | 0.9466 | 0.5614 | 0.7251 | 0.7358 | 0.7736 | 0.89 | 0.3556 |
| LASSO | Random forest | 0.939 | 0.9434 | 0.9416 | 0.9814 | 0.8492 | 0.742 | 0.7544 | 0.807 | 0.8594 | 0.4948 |
| Gradient bossting decision trees | 0.9257 | 0.9502 | 0.9476 | 0.9848 | 0.8656 | 0.7262 | 0.7326 | 0.7892 | 0.8506 | 0.4408 |
| SVM | 0.8306 | 0.8448 | 0.8486 | 0.9532 | 0.5784 | 0.7166 | 0.739 | 0.7744 | 0.894 | 0.3526 |
| Logistic regression | 0.7886 | 0.8108 | 0.8228 | 0.9356 | 0.5028 | 0.7193 | 0.7514 | 0.7836 | 0.8996 | 0.3876 |
| Adaboost | 0.7845 | 0.812 | 0.8184 | 0.9486 | 0.4762 | 0.6918 | 0.72 | 0.7516 | 0.9028 | 0.2692 |
| Bagging | 0.8419 | 0.8486 | 0.8584 | 0.9456 | 0.6098 | 0.737332131 | 0.7516 | 0.785 | 0.8996 | 0.3884 |
| Random forest | Random forest | 0.9055 | 0.903 | 0.8916 | 0.9848 | 0.7014 | 0.7116 | 0.7112 | 0.767 | 0.851 | 0.3654 |
| Gradient bossting decision trees | 0.8492 | 0.872 | 0.872 | 0.9718 | 0.6268 | 0.6962 | 0.6894 | 0.7502 | 0.8424 | 0.3116 |
| SVM | 0.8177 | 0.8252 | 0.8298 | 0.95 | 0.5186 | 0.6909 | 0.7516 | 0.7914 | 0.8818 | 0.4302 |
| Logistic regression | 0.7386 | 0.7614 | 0.7826 | 0.9234 | 0.3624 | 0.7119 | 0.714 | 0.755 | 0.891 | 0.2826 |
| Adaboost | 0.7491 | 0.76 | 0.7624 | 0.963 | 0.2606 | 0.6965 | 0.711 | 0.7324 | 0.9338 | 0.1616 |
| Bagging | 0.816 | 0.8262 | 0.8398 | 0.9346 | 0.559 | 0.7161 | 0.7048 | 0.7514 | 0.8728 | 0.2908 |
| Conventional clustering-based | SVM-RFE | Random forest | 0.9885 | 0.9714 | 0.9808 | 0.98 | 0.9506 | 0.6772 | 0.716 | 0.7968 | 0.8172 | 0.4642 |
| Gradient bossting decision trees | 0.9538 | 0.94 | 0.9438 | 0.9744 | 0.8556 | 0.6475 | 0.707 | 0.7748 | 0.8356 | 0.3892 |
| SVM | 0.8291 | 0.8296 | 0.823 | 0.9688 | 0.4892 | 0.6439 | 0.719 | 0.7618 | 0.8836 | 0.3128 |
| Logistic regression | 0.7847 | 0.7964 | 0.7976 | 0.9568 | 0.4048 | 0.6728 | 0.7286 | 0.7532 | 0.9194 | 0.2598 |
| Adaboost | 0.8461 | 0.8374 | 0.8548 | 0.932 | 0.6058 | 0.6716 | 0.7064 | 0.7678 | 0.8438 | 0.3702 |
| Bagging | 0.7884 | 0.7938 | 0.7972 | 0.9532 | 0.4048 | 0.6774 | 0.7222 | 0.7546 | 0.9104 | 0.259 |
| LASSO | Random forest | 0.9345 | 0.9118 | 0.931 | 0.9454 | 0.8288 | 0.672 | 0.6908 | 0.7776 | 0.7988 | 0.4222 |
| Gradient bossting decision trees | 0.8193 | 0.8256 | 0.841 | 0.9334 | 0.5622 | 0.6788 | 0.7256 | 0.7718 | 0.8758 | 0.3568 |
| SVM | 0.7384 | 0.7824 | 0.7788 | 0.969 | 0.3262 | 0.6042 | 0.7448 | 0.7622 | 0.9338 | 0.2808 |
| Logistic regression | 0.7134 | 0.7692 | 0.777 | 0.9468 | 0.3346 | 0.6436 | 0.7288 | 0.756 | 0.9194 | 0.2586 |
| Adaboost | 0.7269 | 0.7682 | 0.7668 | 0.97 | 0.2746 | 0.644 | 0.7286 | 0.7422 | 0.946 | 0.1954 |
| Bagging | 0.8004 | 0.8004 | 0.8098 | 0.9446 | 0.4488 | 0.6448 | 0.6876 | 0.7378 | 0.8746 | 0.2258 |
| Random forest | Random forest | 0.9574 | 0.94 | 0.9526 | 0.963 | 0.8832 | 0.66385 | 0.7096 | 0.7922 | 0.8088 | 0.4662 |
| Gradient bossting decision trees | 0.9159 | 0.911 | 0.9096 | 0.9754 | 0.7528 | 0.6615 | 0.7068 | 0.7712 | 0.8486 | 0.3556 |
| SVM | 0.7707 | 0.8002 | 0.7982 | 0.9632 | 0.4022 | 0.6107 | 0.7224 | 0.7578 | 0.898 | 0.2926 |
| Logistic regression | 0.7228 | 0.7692 | 0.7662 | 0.9724 | 0.272 | 0.6581 | 0.735 | 0.7488 | 0.9464 | 0.2164 |
| Adaboost | 0.7821 | 0.7988 | 0.8074 | 0.9444 | 0.4434 | 0.6834 | 0.7508 | 0.7852 | 0.9012 | 0.379 |
| Bagging | 0.7937 | 0.8042 | 0.8078 | 0.951 | 0.4456 | 0.6638 | 0.7382 | 0.7604 | 0.9246 | 0.2808 |
| Non-habitat | SVM-RFE | Random forest | 0.9934 | 0.9684 | 0.9632 | 0.9942 | 0.9052 | 0.7169 | 0.7128 | 0.7866 | 0.8222 | 0.4468 |
| Gradient bossting decision trees | 0.9719 | 0.945 | 0.9438 | 0.9832 | 0.8508 | 0.6864 | 0.6844 | 0.7694 | 0.7954 | 0.4134 |
| SVM | 0.8276 | 0.817 | 0.8392 | 0.9276 | 0.5456 | 0.6637 | 0.6848 | 0.7562 | 0.8266 | 0.3376 |
| Logistic regression | 0.8046 | 0.7918 | 0.7944 | 0.9588 | 0.3822 | 0.7019 | 0.7284 | 0.7654 | 0.8978 | 0.318 |
| Adaboost | 0.8695 | 0.8366 | 0.8398 | 0.959 | 0.5374 | 0.6865 | 0.7382 | 0.78 | 0.8844 | 0.3826 |
| Bagging | 0.7916 | 0.777 | 0.7982 | 0.9222 | 0.4208 | 0.6947 | 0.7094 | 0.757 | 0.8756 | 0.3048 |
| LASSO | Random forest | 0.9929 | 0.9734 | 0.98 | 0.9822 | 0.951 | 0.7146 | 0.6718 | 0.799 | 0.7246 | 0.5428 |
| Gradient bossting decision trees | 0.9576 | 0.9328 | 0.934 | 0.9778 | 0.824 | 0.6777 | 0.6844 | 0.7766 | 0.7822 | 0.4452 |
| SVM | 0.867 | 0.8358 | 0.844 | 0.9456 | 0.5678 | 0.6756 | 0.7 | 0.7636 | 0.8402 | 0.3592 |
| Logistic regression | 0.8374 | 0.813 | 0.8182 | 0.9476 | 0.4834 | 0.7211 | 0.7444 | 0.78 | 0.8934 | 0.3818 |
| Adaboost | 0.8956 | 0.847 | 0.8518 | 0.9544 | 0.584 | 0.6915 | 0.7158 | 0.7636 | 0.8712 | 0.3356 |
| Bagging | 0.82 | 0.7932 | 0.8058 | 0.9378 | 0.4394 | 0.7002 | 0.7034 | 0.7554 | 0.8666 | 0.3066 |
| Random forest | Random forest | 0.9926 | 0.9764 | 0.9862 | 0.9808 | 0.9648 | 0.7033 | 0.6784 | 0.7822 | 0.76 | 0.4784 |
| Gradient bossting decision trees | 0.9168 | 0.8952 | 0.8934 | 0.9754 | 0.6986 | 0.69217 | 0.6846 | 0.7732 | 0.791 | 0.4228 |
| SVM | 0.8118 | 0.7924 | 0.798 | 0.95 | 0.407 | 0.6579 | 0.7316 | 0.7784 | 0.88 | 0.3726 |
| Logistic regression | 0.7788 | 0.7722 | 0.7764 | 0.9564 | 0.3208 | 0.7080 | 0.7382 | 0.7656 | 0.9154 | 0.3048 |
| Adaboost | 0.8184 | 0.788 | 0.788 | 0.9622 | 0.3608 | 0.6738 | 0.7196 | 0.7562 | 0.9022 | 0.2748 |
| Bagging | 0.8038 | 0.7786 | 0.7766 | 0.9666 | 0.3178 | 0.7212 | 0.7256 | 0.74 | 0.9468 | 0.1848 |

# Supplementary Information of Radiomics features

1. First-order features
   1. Energy
   2. Total energy
   3. Entropy

Where is approximate to 2.2 * 10e-16. In IBSI, it was defined as Itensity Histogram Entropy

- 1. Minimum

The minimum gray level intensity within the VOI.

- 1. 10th percentile
  2. 90th percentile
  3. Maximum

The maximum gray level intensity within the VOI.

- 1. Mean
  2. Median
  3. Interquartile range
  4. Range
  5. Mean absolute deviation (MAD)
  6. Robust mean absolute deviation (rMAD)
  7. Standard deviation
  8. Root mean square (RMS)
  9. Skewness
  10. Kurtosis
  11. Kurtosis
  12. Kurtosis

1. Shape features
   1. Mesh volume
   2. Voxel volume

Vk is equal to the volume for a single voxel.

- 1. Surface area
  2. Surface area to volume ratio
  3. Sphericity
  4. Compactness 1
  5. Compactness 2
  6. Spherical disproportion
  7. Maximum 3D diameter
  8. Maximum 2D diameter (Slice)
  9. Maximum 2D diameter (Column)
  10. Maximum 2d diameter (Row)
  11. Major axis length

The is the largest principal component to represent the largest axis length of the VOI-enclosing ellipsoid.

- 1. Minor axis length

The is the second-largest principal component to represent the second-largest axis length of the VOI-enclosing ellipsoid.

- 1. Least axis length

The is the smallest principal component to represent the smallest axis length of the VOI-enclosing ellipsoid.

- 1. Elongation
  2. Flatness

1. Gray level co-occurrence matrix (GLCM) features
   1. Autocorrelation
   2. Joint average
   3. Cluster Prominence
   4. Cluster shade
   5. Cluster tendency
   6. Contrast
   7. Correlation
   8. Difference average
   9. Difference entropy
   10. Difference variance
   11. Joint energy
   12. Joint entropy
   13. Inverse difference moment
   14. Maximal correlation coefficient
   15. Inverse difference moment normalized
   16. Inverse difference
   17. Inverse difference normalized
   18. Inverse variance
   19. Maximum probability
   20. Sum average
   21. Sum entropy
   22. Sum of squares
2. Gray level size zone matrix features
   1. Small area emphasis
   2. Large area emphasis
   3. Gray level non-uniformity
   4. Gray level non-uniformity normalized
   5. Size-zone non-uniformity
   6. Size-zone non-uniformity normalized
   7. Zone percentage
   8. Gray level variance
   9. Zone variance
   10. Zone entropy
   11. Low gray level zone emphasis
   12. High gray level zone emphasis
   13. Small area low gray level emphasis
   14. Small area high gray level emphasis
   15. Large area low gray level emphasis
   16. Large area high gray level emphasis
3. Gray level run length matrix features
   1. Short run emphasis
   2. Long run emphasis
   3. Gray level non-uniformity
   4. Gray level non-uniformity normalized
   5. Run length non-uniformity
   6. Run length non-uniformity normalized
   7. Run percentage
   8. Gray level variance
   9. Run variance
   10. Run entropy
   11. Low gray level run emphasis
   12. High gray level run emphasis
   13. Short run low gray level emphasis
   14. Short run high gray level emphasis
   15. Long run low gray level emphasis
   16. Long run high gray level emphasis
4. Neighboring gray tone difference matrix features
   1. Coarseness
   2. Contrast
   3. Busyness
   4. Complexity
   5. Strength
5. Gray level dependence matrix features
   1. Small dependence emphasis
   2. Large dependence emphasis
   3. Gray level non-uniformity
   4. Dependence non-uniformity
   5. Dependence non-uniformity normalized
   6. Gray level variance
   7. Dependence variance
   8. Dependence entropy
   9. Low gray level emphasis
   10. High gray level emphasis
   11. Small dependence low gray level emphasis
   12. Small dependence high gray level emphasis
   13. Large dependence low gray level emphasis
   14. Large dependence high gray level emphasis
6. Wavelets-local binary pattern features

- The extraction of this kind of features is simple. The input image needs to be process by wavelet transform and local binary pattern in order. Then we extract the first-order features from these processed images.

1. Co-occurrence of Local Anisotropic Gradient Orientations (CoLlAGe) features (Gradient features)

- The method we used is the 3D version of CoLIAGe features. The algorithm is summarized below:
- Data: VOI volume
- Result: 3D CoLIAGe features, and
- begin
- for each voxel , do
- Obtain gradient , and along X-, Y-, and Z-axes;
- end
- for each voxel , do

Compute gradient vectors , , and in neighborhood of ;

Obtain localized gradient vector matrix ;

Compute dominant components and by SVD of ;

Obtain dominant orientations and , using Eq. S1 and S2 respectively;

end

Compute co-occurrence matrix from and from using Eq. S3 and S4;

Compute the and from and based on Haralick features, respectively;

Compute the histogram features and from and , respectively;

end

Eq. 1

Eq. 2

Eq. 3

Eq. 4
